# Supplementary material
Source: PubMed Central journal article supplement (PMC3381323)
Supplement: tjp0590-0991-SD1.pdf [file tjp0590-0991-SD1.pdf]

## **Supplementary information**

**Prenatal stress alters hippocampal synaptic plasticity in young rat offspring through preventing the proteolytic conversion of pro-BDNF to mature BDNF**

Che-Ming Yeh<sup>1</sup>, Chiung-Chun Huang<sup>2</sup> and Kuei-Sen Hsu<sup>1,2</sup>

<sup>1</sup>Institute of Basic Medical Sciences, and <sup>2</sup>Department of Pharmacology, College of Medicine, National Cheng Kung University, Tainan 701, Taiwan

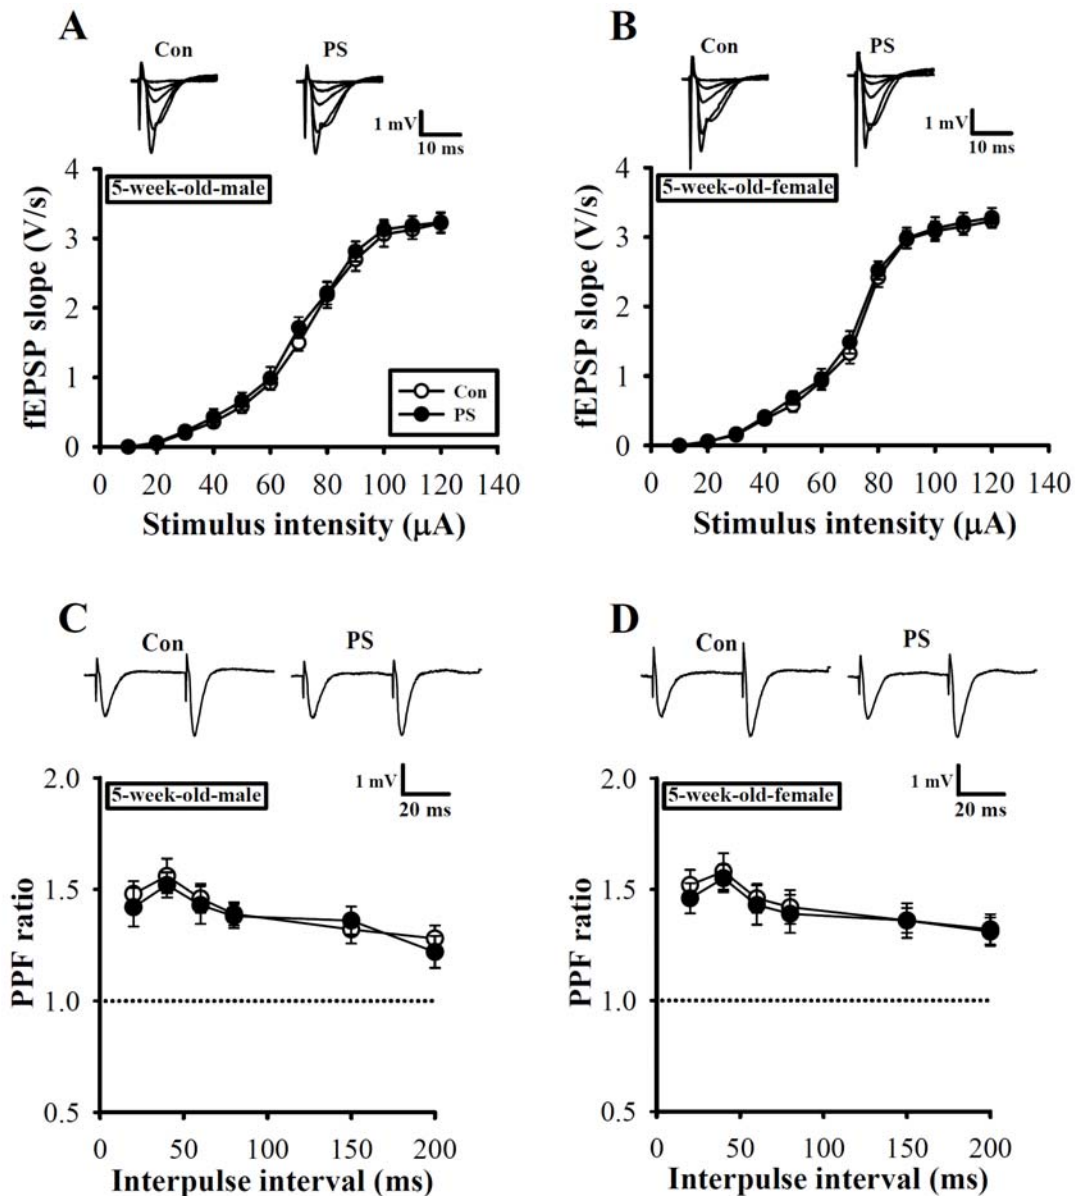

**Supplementary Figure S1. Effect of PS on basal synaptic transmission and paired-pulse facilitation (PPF) in the CA1 region of the hippocampus at 5 weeks old**

A and B, input-output curve of fEPSP slope (V/s) versus stimulus intensity ( $\mu\text{A}$ ) at the Schaffer collateral-CA1 synapses of hippocampal slices from Con- and PS-treated male (A) and female (B) rats. Inset shows overlaid traces evoked in a slice from Con- and PS-treated rat. C and D, comparison of PPF ratio in slices from Con- and PS-treated male (C) and female (D) rats. The plot summarizes facilitation of the second fEPSP slope relative to the first one as a function of the interpulse intervals of 20 to 200 ms. Inset shows example PPF obtained with interpulse interval of 40 ms in a slice from Con- and PS-treated rat. Dash lines show level of baseline. Data represent the mean  $\pm$  SEM ( $n = 6$  for each group).

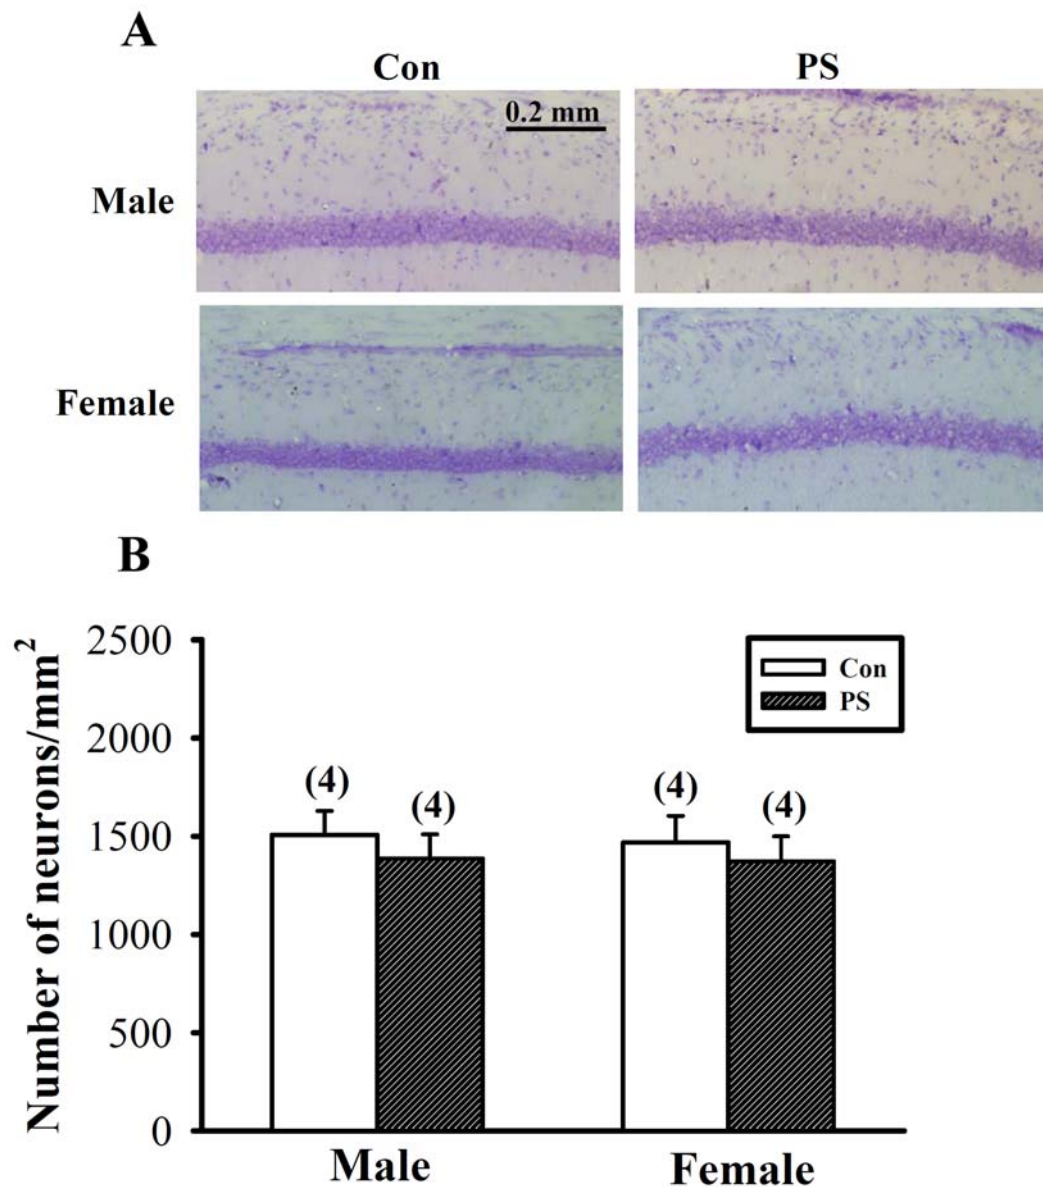

**Supplementary Figure S2. Effect of PS on the number of pyramidal neurons in hippocampal CA1 region**

A, representative photographs with Cresyl violet staining of CA1 region showing that the number of pyramidal neurons was not significantly affected by PS treatment compared with age-matched Con-treated rats of both sexes. B, group data showing the summary results from 4 rats of each group at 5 weeks old.

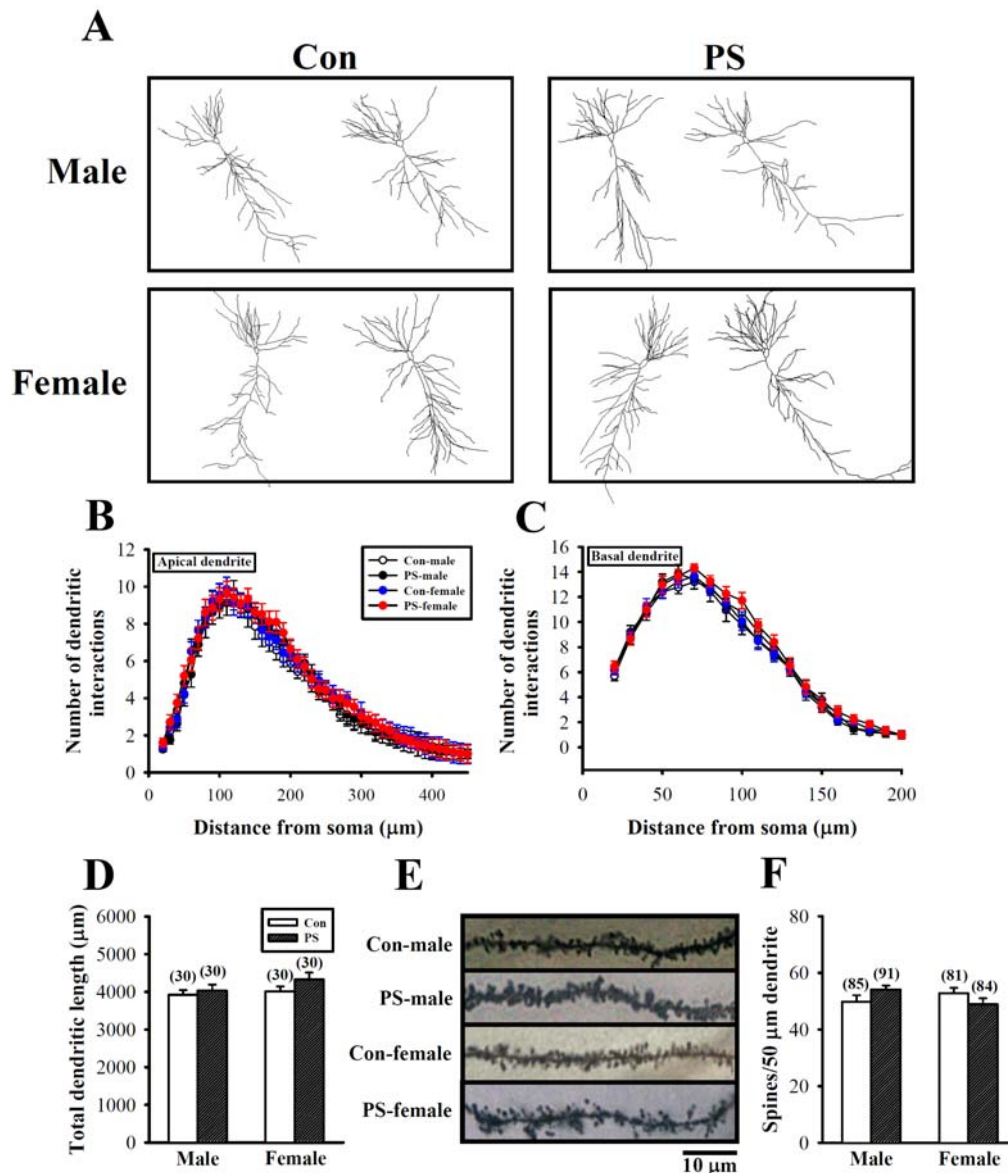

**Supplementary Figure S3.** Effect of PS on dendritic morphology and spine density of pyramidal neurons in hippocampal CA1 region

A, representative camera lucida tracings of hippocampal CA1 pyramidal neurons from Con- or PS-treated male and female rats at 5 weeks old. B and C, Sholl analysis of apical (B) basal (C) dendrites of CA1 pyramidal neurons from Con- and PS-treated male and female rats (24 cells in each group). D, summary bar graphs depicting total dendritic length of CA1 pyramidal neurons from Con- and PS-treated rats. E, representative images of the primary branch of hippocampal CA1 pyramidal neurons from Con- and PS-treated male and female rats. F, summary bar graphs depicting the spine density in apical dendrites of CA1 pyramidal cells from Con- and PS-treated rats. Data represent the mean  $\pm$  SEM. The total number of neurons examined is indicated by *n* in parenthesis.
